# Supplementary material for: WITHDRAWN: The Effect of Music and Comedy Film on Pain, Vital Findings and Cortisol Levels in Patients
Source: Research Square preprint supplement (doi:10.21203/rs.3.rs-7074588/v1), 2025-09-22
Supplement: Supplementary file 1 [file 05e466151490be1507de7574.docx]

Table 1.Sociodemographic characteristics of the Experimental and Control Groups (N=137)

| **Specifications** | **Music Group**  **(n=45)** | **Comedy Movie**  **Group**  **(n=46)** | **Control**  **Group**  **(n=46)** | **Test and P Value** |
| --- | --- | --- | --- | --- |
| **Age** | **(Mean±SD)**  40.31±13.96 | **(Mean±SD)**  35.56±12.12 | **(Mean±SD)**  38.36±13.51 | KWH: 2.782  p:0.249 |
|  | **s %** | **s %** | **s %** |  |
| **Gender** |  |  |  |  |
| Woman | 17 (37.8) | 17 (37.0) | 18 (39.1) | x2: 0.047  p:0.977 |
| Boy | 28 (62.2) | 29 (63.0) | 28 (60.9) |
| **Marital status** |  |  |  |  |
| The married | 38 (84.4) | 30 (65.2) | 34 (73.9) | x2: 4.432  p:0.109 |
| Single | 7 (15.6) | 16 (34.8) | 12 (26.1) |
| **Level of education** |  |  |  |  |
| Not Literate/ Literate | 5 (11.1) | 0 (0.0) | 7 (15.2) | *x2: 12,224  p: 0.053 |
| Primary education | 22 (48.9) | 18 (39.1) | 14 (30.4) |
| High school | 11 (24.4) | 14 (30.4) | 14 (30.4) |
| University and Above | 7 (15.6) | 14 (30.4) | 11 (23.9) |
| **Working Status** |  |  |  |  |
| working | 25 (55.6) | 23 (50.0) | 20 (43.5) | x2:1.331  p: 0.514 |
| Not working | 20 (44.4) | 23 (50.0) | 26 (56.5) |

Mean: Arithmetic mean, SD: Standard Deviation.

**Table 2.** Medical Characteristics of Experimental and Control Groups (N=137)

| Specifications | **Music**  **Group**  (n=45) | **Comedy Movie**  **Group**  (n=46) | **Control**  **Group**  (n=46) | **Testing and Materiality**  x2/p |
| --- | --- | --- | --- | --- |
| Time Between Last Analgesic Hour and Intervention (Hours) | **(Mean±SD)**  5.41±2.59 | **(Mean±SD)**  6.12 ±3.46 | **(Mean±SD)**  6.13±3. 31 | KWH: 0.184  p:0.912 |
|  | **s %** | **s %** | **s %** |  |
| **Presence of Chronic Disease**  Yes  No | 8 (17.8)  37 (82.2) | 3 (6.5)  43 (93.5) | 8 (17.4)  38 (82.6) | x2: 3.132  p:0.209 |
| **Previous Surgery Status**  Yes  No | 30 (66.7)  15 (33.3) | 33 (71.7)  13 (28.3) | 30 (65.2)  16 (34.8) | x2:0.494  p:0.781 |
| **Previous Post-Operative Pain Management Method**  Non-pharmacological Method**  Pharmacological Method | 3 (6.7)  42 (93.30) | 8 (17.4)  38 (82.6) | 4 (8.7)  42 (91.3) | *****x2:2.762  p:0.309 |
| **Diagnosis**  Trauma  Arthrosis  Mass  Infection  Other *** | 27(60.0)  4 (8.9)  6 (13.3)  4 (8.9)  4 (8.9) | 32 ( 69.6)  3 (6.5)  4 (8.7)  2 (4.3)  5 (10.9) | 28 (60.9)  6 (13.0)  7 (15.2)  1 (2.2)  4 (8.7) | *x2:4.407  p:0.841 |
| **Type of Surgery**  Osteosynthesis  Prosthesis  Excision/Resection  Repair  Other**** | 23 (51.1)  5 (11.1)  5 (11.1)  10 (22.2)  2 (4.4) | 21 (45.7)  4 (8.7)  7 (15.2)  14 (30.4)  0 (0.0) | 19 (41.3)  7 (15.2)  4 (8.7)  12 (26.1)  4 (8.7) | x2: 6,746  p:0.564 |
| **Type of Anesthesia**  General  Spinal/Epidural  Other (Axillary, LMA, Popliteal) | 16 ( 35.6)  25 (55.6)  4 (8.9) | 16 (34.8)  28 (60.9)  2 (4.3) | 20 (43.5)  17 (36.9)  9 (19.6) | x2: 8.519  p:0.074 |
| **Analgesic Type**  NSAID  Opioid | 38 ( 84.4)  7 (15.6) | 42 ( 91.3)  4 (8.7) | 34 (73.9)  12 (26.1) | x2: 5.053  p: 0.080 |

Mean: Arithmetic mean, SD: Standard Deviation, p < 0.05.

* Herbal method, TV, walking, sleeping, cold application, nothing

** Kienböck, femoral shortness, Achilles tension, Clow Teo, Carpal tunnel syndrome

*** Amputation, Kienböck Surgery

**** Axillary, Laryngeal Mask Airway, Popliteal

**Table 3.**Comparison of Pain Levels of Experimental and Control Groups Between and Within Groups

| **Pain Levels** | **Measurement**  **The Time** | **Music Group**x | | **Comedy Film Group**y | **Control**  **Group**z | | | **Test and P Value**** | [**Significance**](https://www.seslisozluk.net/significance-nedir-ne-demek/) | |
| --- | --- | --- | --- | --- | --- | --- | --- | --- | --- | --- |
| **Median**  (Min.-Max.) | **Median**  **(**Min.-Max.) | | | **Median**  (Min.-Max.) | |
| **0. mina** | 6 (4-10) | | 5 (4-9) | 5 (4-9) | | | χ 2:13.94  **p=0.001** | | x>y |
| **30. minb** | 4 (0-9) | | 4 (0-9) | 6 (3-8) | | | χ 2: 19.16  **p<0.001** | | z>x,y |
| **60. minc** | 4 (0-9) | | 4 (0-9) | 6 (3-10) | | | χ 2 :24.3  **p<0.001** | | z>x,y |
| **Test and p value*** | | χ 2:47.4 p<0.001 | | χ 2: 24.17 p<0.001 | | | χ 2 :8.23 ***p=0.016 | |  | |
| **meaningfulness** | | a>b,c | | a>b,c |  | | |  |  | |

* Friedman test, ** Kruskal-Wallis H test, p < 0.05.

*** In the control group, a statistically significant difference was found between the measurement times in terms of pain levels, and then Bonferroni corrected multiple comparison tests were performed. However, due to the conservative nature of the Bonferroni correction method, no significant difference was detected in the multiple comparison tests.

**Table 4.**Comparison of Vital Findings of Experimental and Control Groups Between and Within Groups

| **Vital Signs** | **Measurement Time** | **Music**  **Group**  (n=45) | **Comedy**  **Movie**  **Group**  (n=46) | | | | **Control**  **Group**  (n=46) | | | | **Test and P Value**** | | |
| --- | --- | --- | --- | --- | --- | --- | --- | --- | --- | --- | --- | --- | --- |
|  | | **Mean±SD** | | **Mean±SD** | | | **Mean±SD** | | | |  | | |
| **Systolic Blood Pressure/**  **mmHg** | 0.min | 127.71±17.05 | | 124.87±17.83 | | | | 127.41±12.78 | | | | F=0.43 p=0.65 | |
| 30. min | 127.71±16.36 | | 124.20±17.90 | | | | 125.89±13.36 | | | | F=0.55 p=0.58 | |
| 60.min | 126.42±17.52 | | 125.00±17.25 | | | | 124.59±12.64 | | | | F=0.17 p=0.85 | |
| **Test and P Value*** | | F=0.489  p=0.615 | | | F=0.164  p=0.849 | | | | F=2.01  p=0.14 | | |  | |
| **Diastolic Blood Pressure/**  **mmHg** | 0.min | 77.89±14.34**a** | | 78.57 ±14.36 | | | | 79.07±11.65 | | | | | F=0.09 p=0.92 |
| 30. min | 81.73±13.57 | | 79.26±12.20 | | | | 81.13±10.24 | | | | | F=0.52 p=0.60 |
| 60. min | 81.09±13.36 | | 79.43±11.06 | | | | 80.61±9.49 | | | | | F=0.25 p=0.78 |
| **Test and P Value*** | | F=3.66  **p=0.03** | | | | F=0.241  p=0.786 | | | | F=0.947  p=0.392 | | |  |
| **Pulse Rate/min** | 0.min | 85.87±17.26 | | 85.24±13.78 | | | | 85.13±15.31 | | | | | F=0.03 p=0.97 |
| 30. min | 87.33±16.59 | | 86.37±14.14 | | | | 84.00±11.69 | | | | | F=0.66 p=0.52 |
| 60. min | 87.27±16.33 | | 85.11±13.33 | | | | 84.89±12.73 | | | | | F:0.39 p=0.68 |
| **Test and P Value*** | | F=1.21  p=0.30 | | | | F=0.74  p=0.48 | | | | F=0.43  p=0.65 | | |  |
| **Respiration** 0.min  **Rate/minute** 30.min  60. min | | 23.11±4.01  22.07±4.17  23.13±4.31 | | | | 21.35±3.63  21.04±3.23  21.22±3.85 | | | | 21.43±4.44  21.22±3.83  22.57±4.04 | | | ****χ 2=5.15 p=0.08  ****χ 2= 1.31 p=0.52  ****χ 2=4.15 p=0.13 |
| **Test and P Value***** | | χ 2: 4.54  p=0.10 | | | | χ 2:0.65  p=0.72 | | | | χ 2:5.17  p=0.07 | | |  |

a: It is different from the 30th minute. Mean: Arithmetic mean, SD: Standard Deviation, p < 0.05.

* One-Way Analysis of Variance in Repeated Measurements, ** One-Way Analysis of Variance in Independent Samples.

*** Friedman test, **** Kruskal-Wallis H test

**Table 5.**Comparison of Cortisol Levels of Experimental and Control Groups Between and Within Groups

| **Cortisol Levels** | **Measurement**  **The Time** | | | **Music**  **Group** | | **Comedy Movie**  **Group** | | | **Control**  **Group** | **Test / P Value**** |
| --- | --- | --- | --- | --- | --- | --- | --- | --- | --- | --- |
| **Median (Min.-Max.)** | | **Median (Min.-Max.)** | | | **Median(Min.-Max.)** |
| **0. min** | | 26.47 (3.13-556.87) | | 22.07 (1-419.02) | | | 26.82 (1-416) | | χ 2=0.16, p=0.92 |
| **30. min** | | 27.41 (2.65-246.29) | | 30.96 (1-368.72) | | | 32.79 (1-367.58) | | χ 2=0.74, p=0.69 |
| **60. min** | | 25.52 (3.82-130.09) | | 37.25 (0.26-474.06) | | | 38.47 (2.01-337.35) | | χ 2=2.05, p=0.36 |
| **Test and P Value*** | | χ 2=0.58, p=0.75 | | | χ 2=1.91, p=0.38 | | χ 2=4.23, p=0.12 | | |  |

* Friedman test, ** Kruskal-Wallis H test
